# Supplementary material for: MOCVD-Grown Ga2O3 as a Gate Dielectric on Algan/Gan Based Heterojunction Field Effect Transistor
Source: Preprints.org preprint supplement (doi:10.20944/preprints202301.0174.v1), 2023-01-10
Supplement: Supplementary file 3 [file supplementary]

**Supplementary Information**

**MOCVD-grown Ga2O3 as a gate dielectric on AlGaN/GaN based heterojunction field effect transistor.**

Samiul Hasan1*, Mohi Uddin Jewel1, Scott R. Crittenden2, Dongkyu Lee3, Vitaliy Avrutin4, Ümit Özgür4, Hadis Morkoç4, and Iftikhar Ahmad1*

1Department of Electrical Engineering, University of South Carolina, Columbia, SC 29208, USA

2Department of Physics and Astronomy, University of South Carolina, Columbia, SC 29208, USA

3Department of Mechanical Engineering, University of South Carolina, Columbia, SC 29208, USA

4Department of Electrical and Computer Engineering, Virginia Commonwealth University, Richmond, VA 23284, USA

E-mail: [shasan@email.sc.edu](mailto:shasan@email.sc.edu), [ahmad@cec.sc.edu](mailto:ahmad@cec.sc.edu)


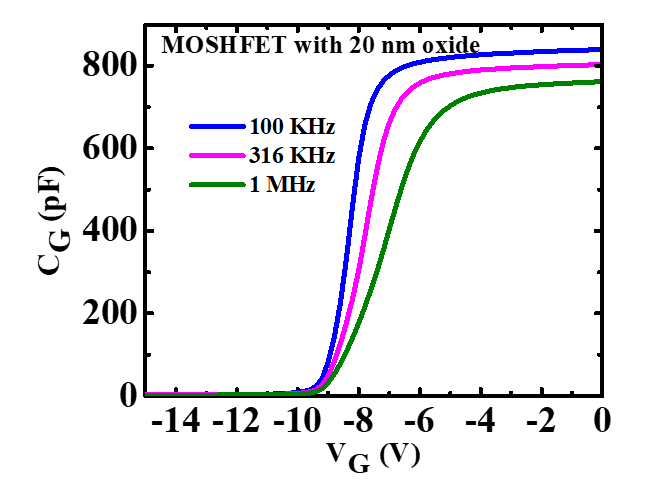


**(a)**

**
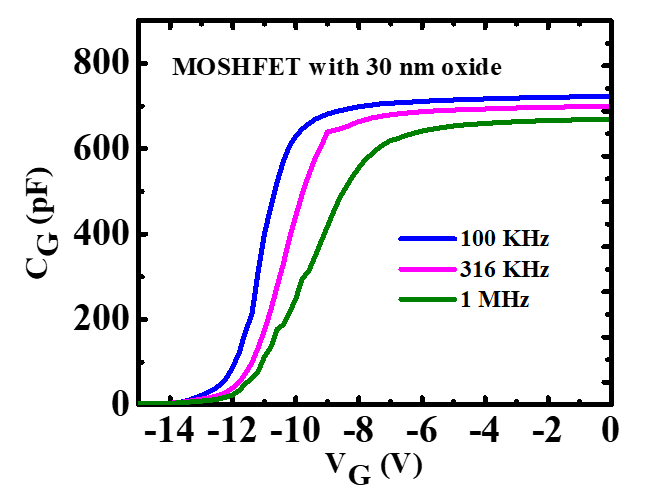
**

**(b)**

**
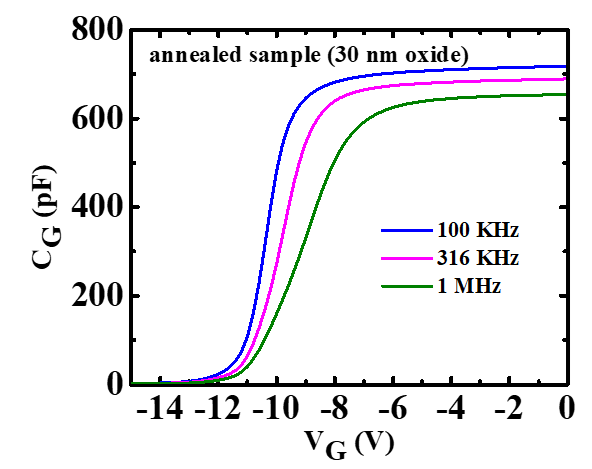
**

**(c)**

**Figure S1.**  Frequency-dependent CV measurements of MOSHFET with (a) 20 nm thick gate oxide(b) 30 nm thick gate oxide, and (c) annealed 30 nm thick gate oxide.
